# Supplementary material
Source: PubMed Central journal article supplement (PMC3472162)

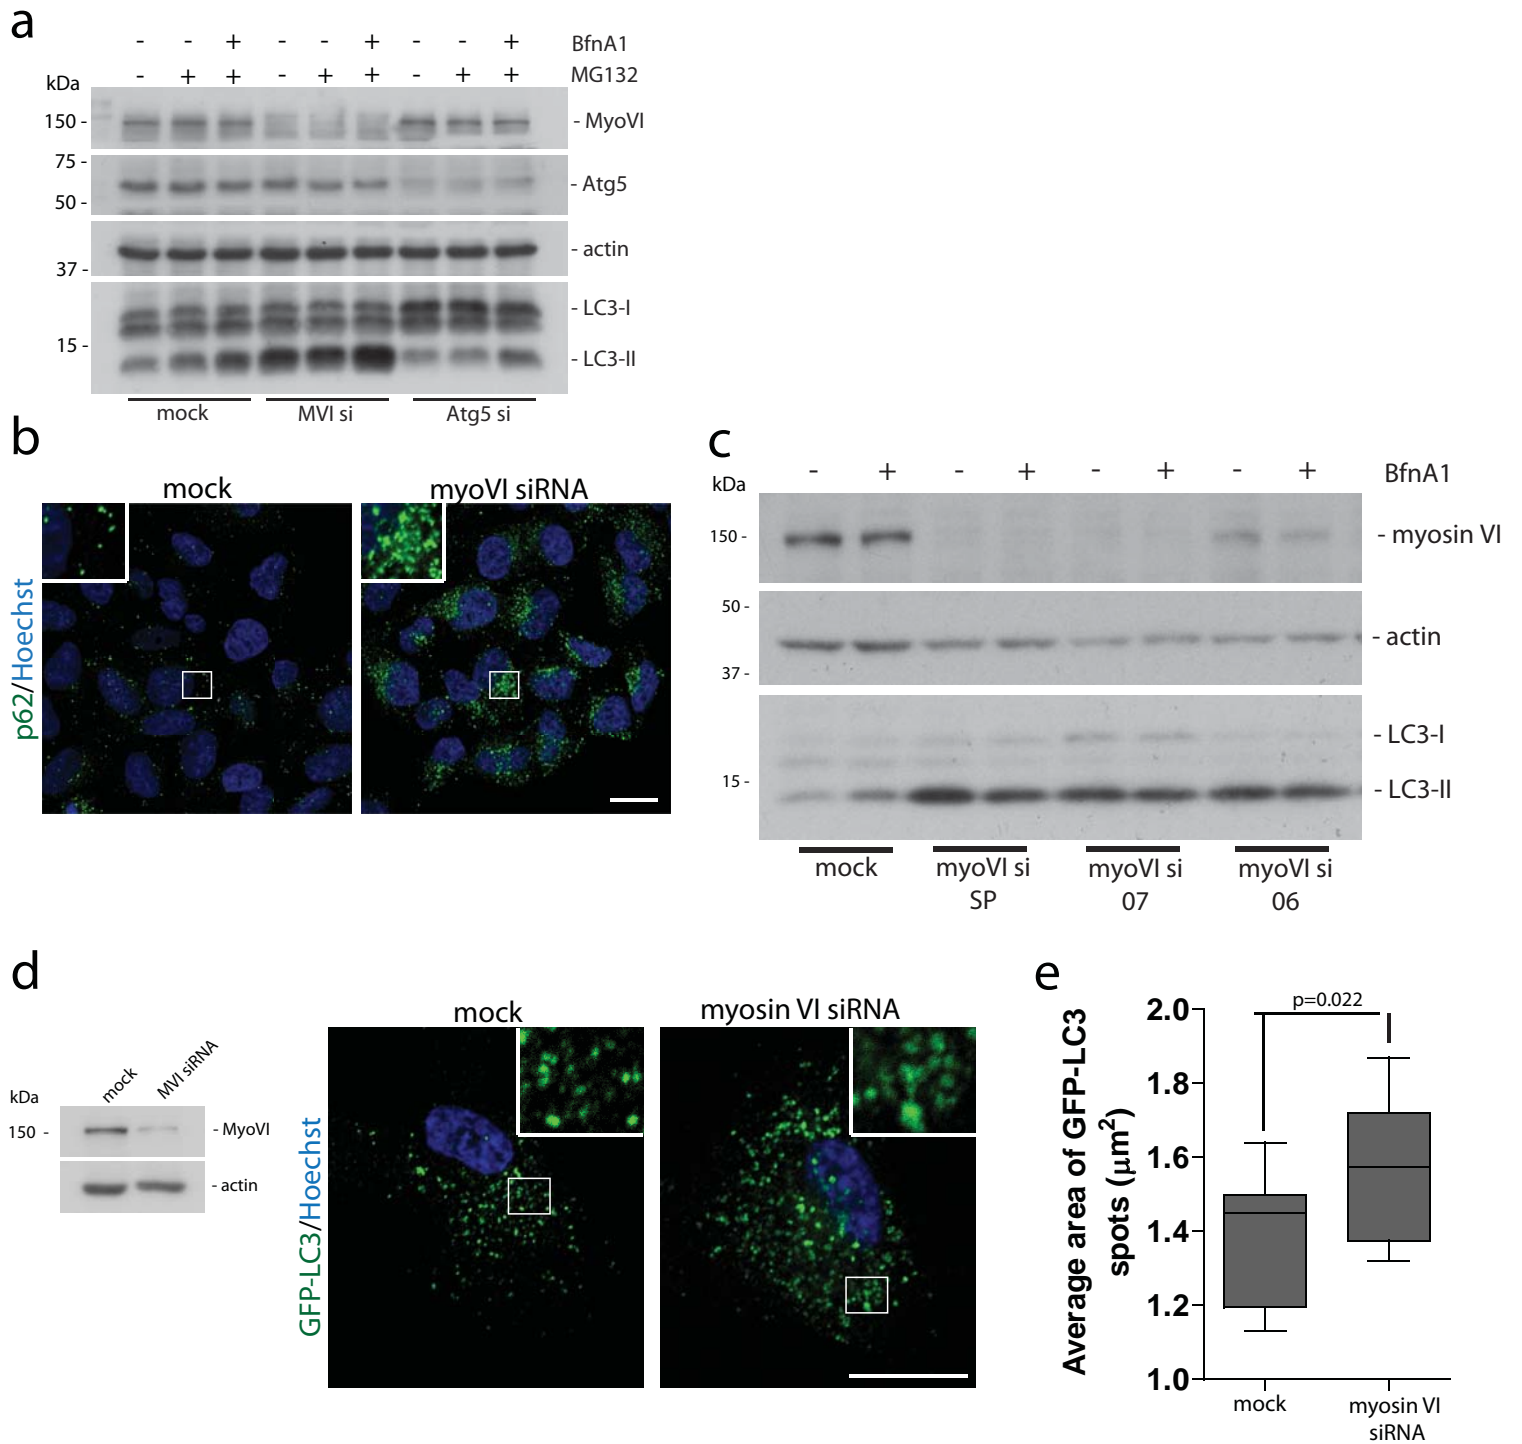

Tumbarello et al., Supplementary Figure 1

Supplement: NIHMS49789-supplement-figure_1.pdf [file NIHMS49789-supplement-figure_1.pdf]

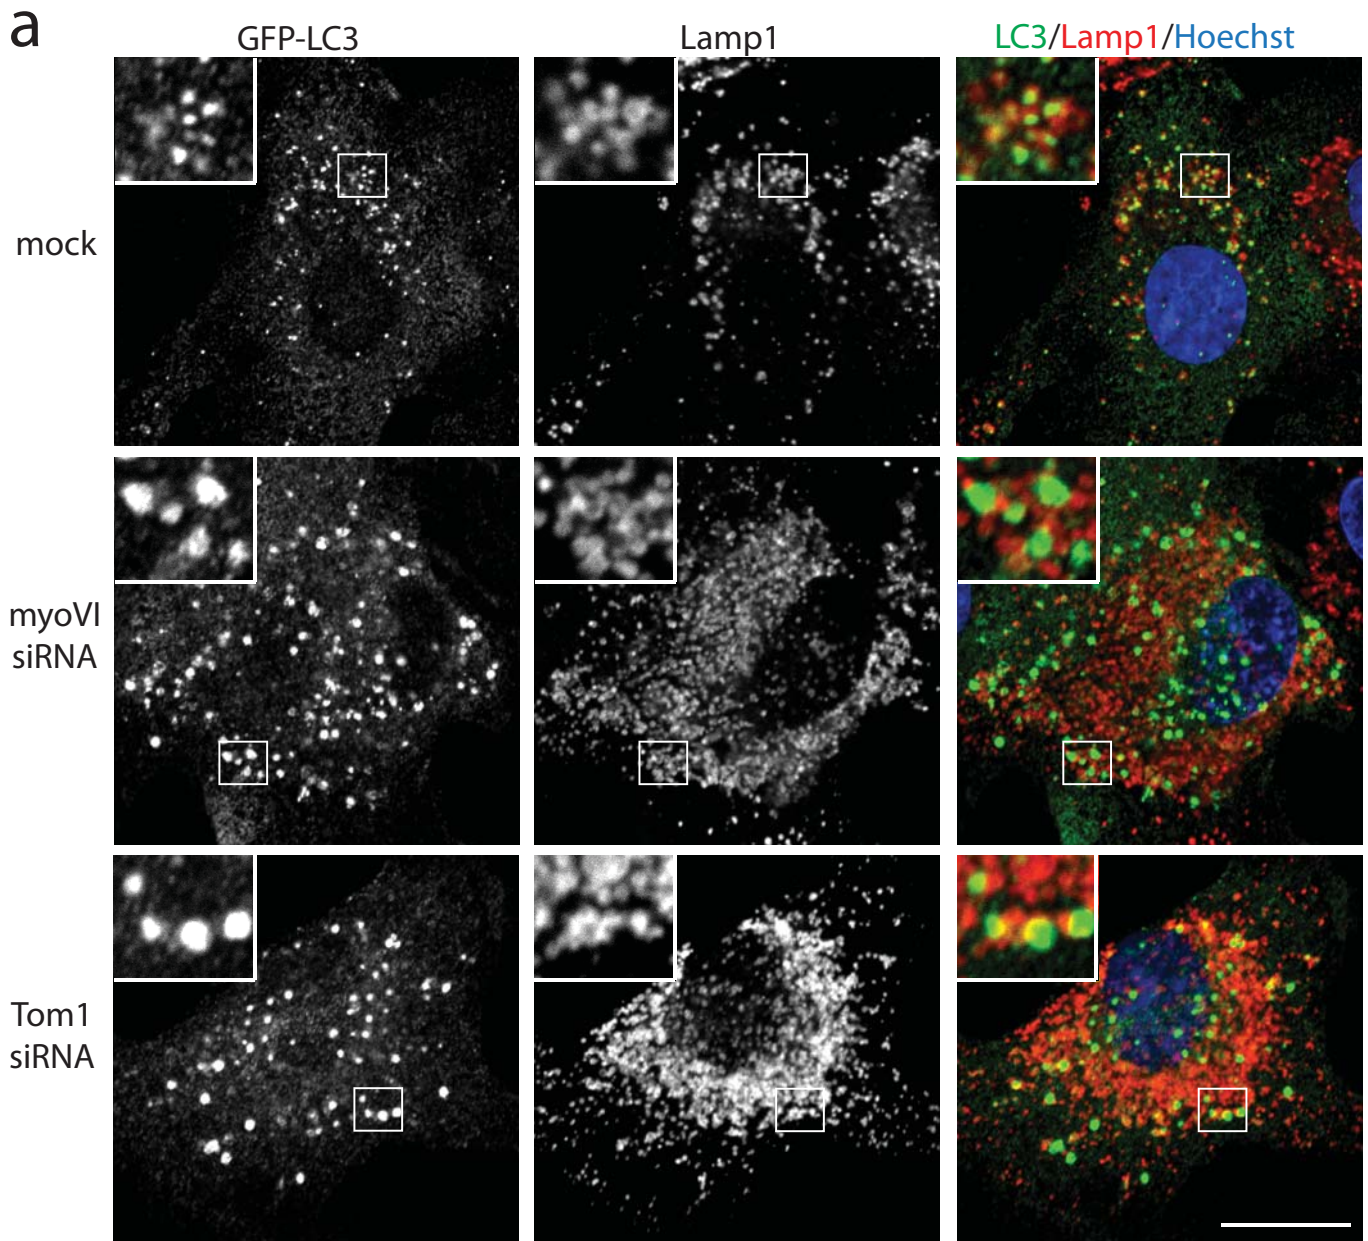

**b**

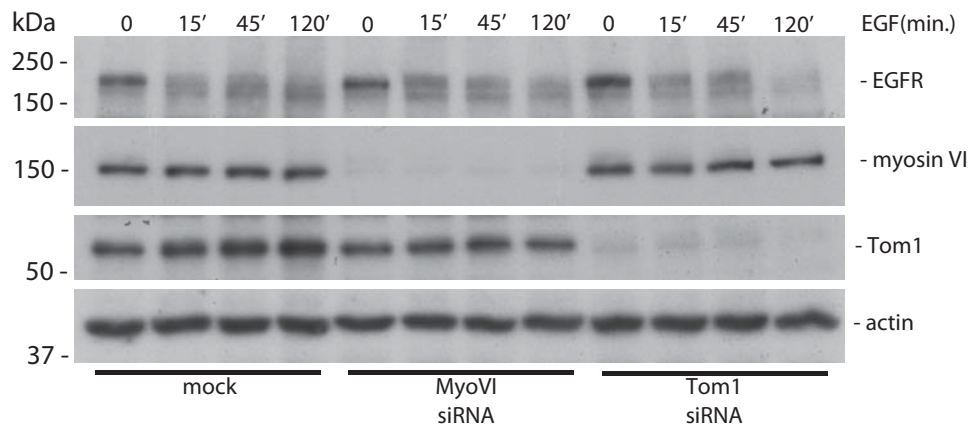

Supplement: NIHMS49789-supplement-figure_2.pdf [file NIHMS49789-supplement-figure_2.pdf]

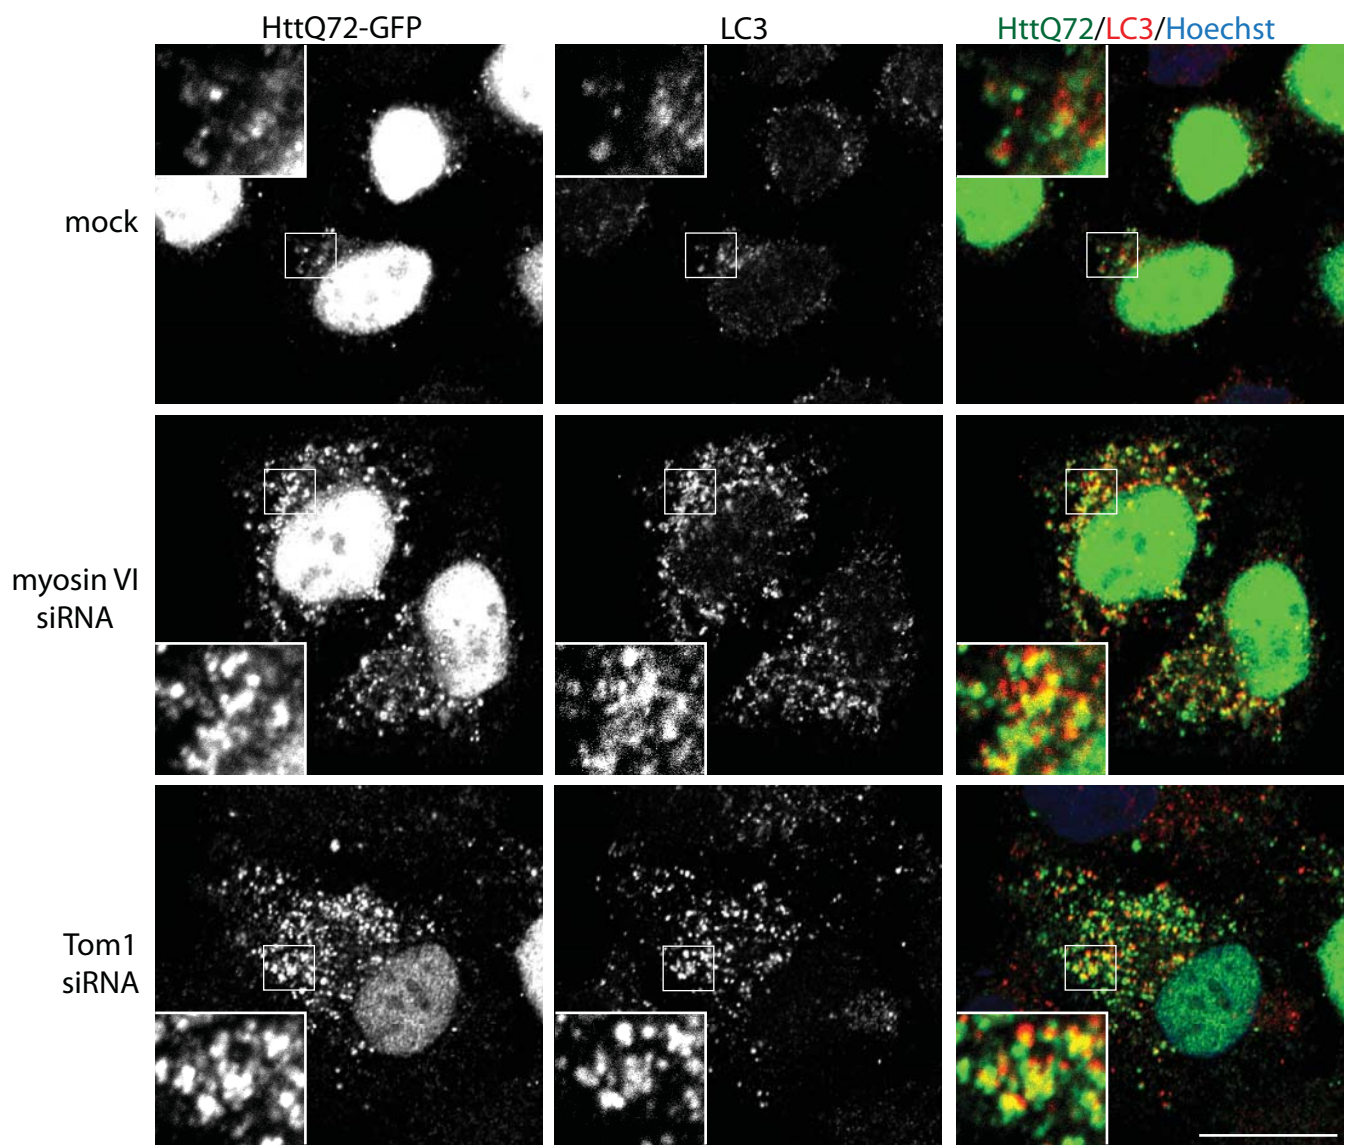

Tumbarello et al., Supplementary Figure 3

Supplement: NIHMS49789-supplement-figure_3.pdf [file NIHMS49789-supplement-figure_3.pdf]

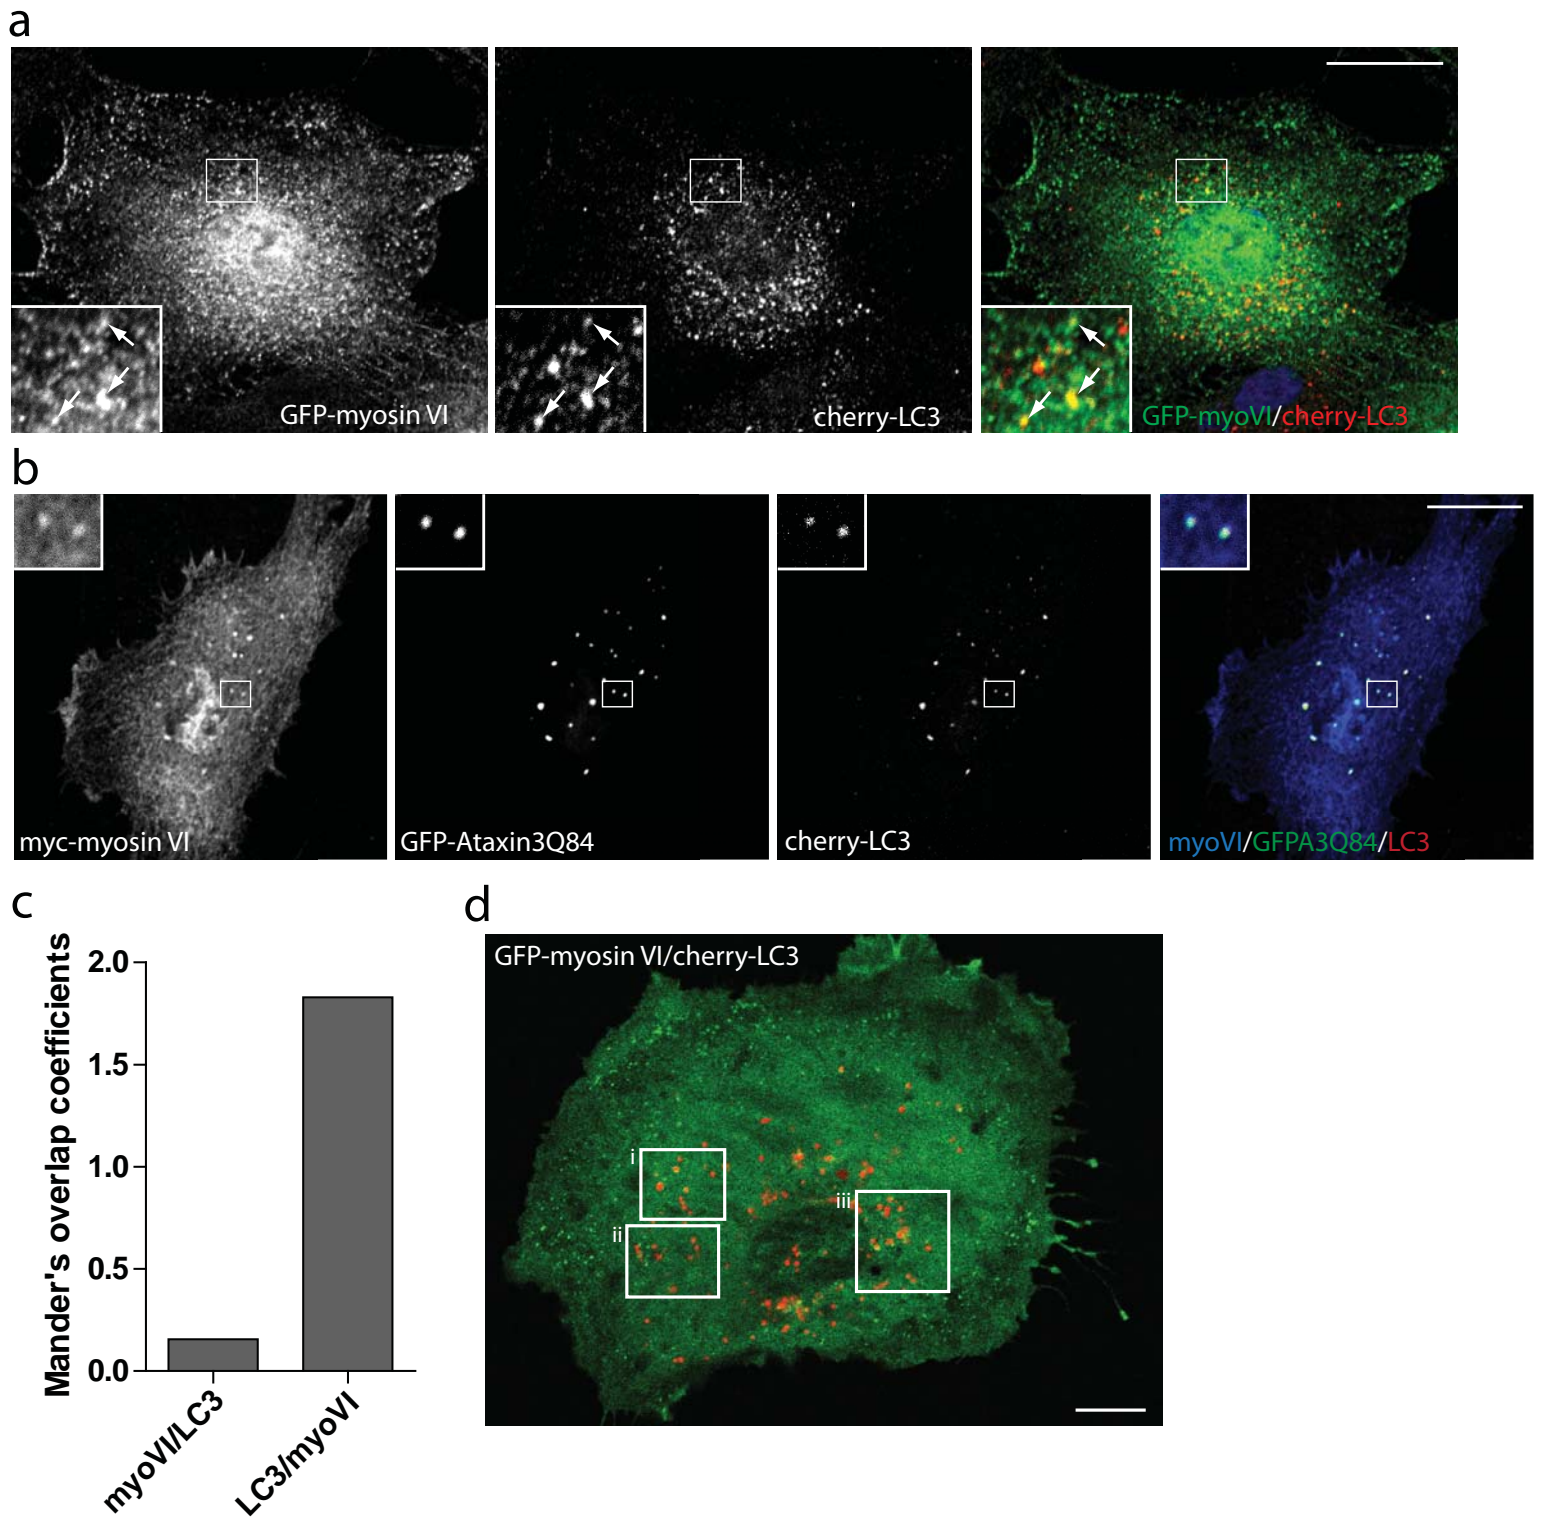

Tumbarello et al., Supplementary Figure 4

Supplement: NIHMS49789-supplement-figure_4.pdf [file NIHMS49789-supplement-figure_4.pdf]

**a**

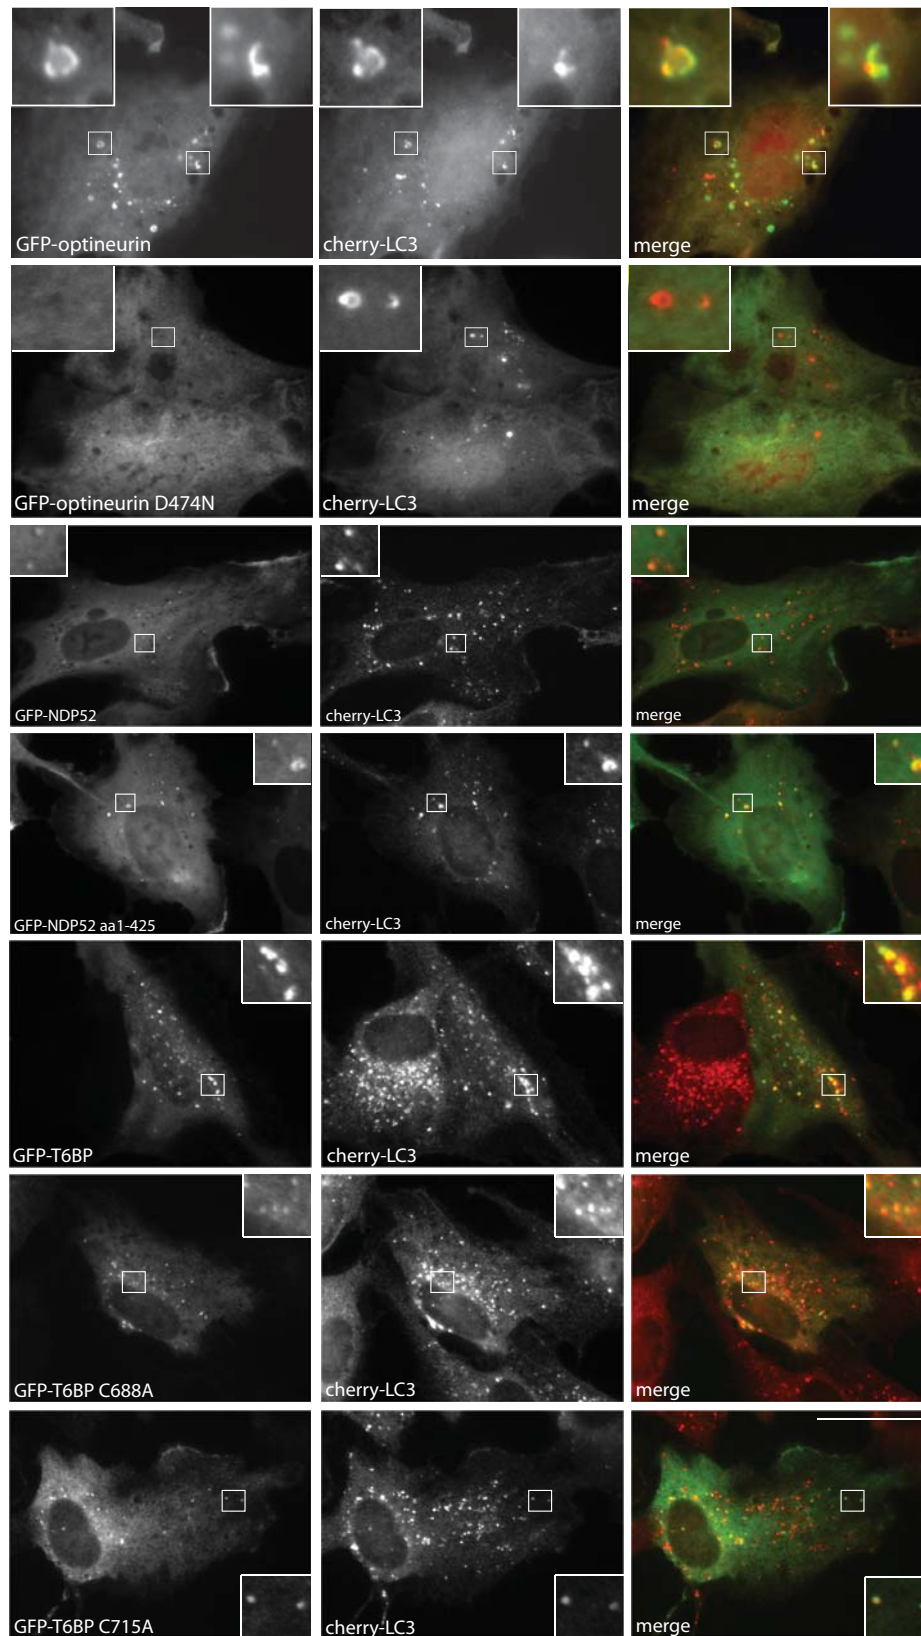

**b**

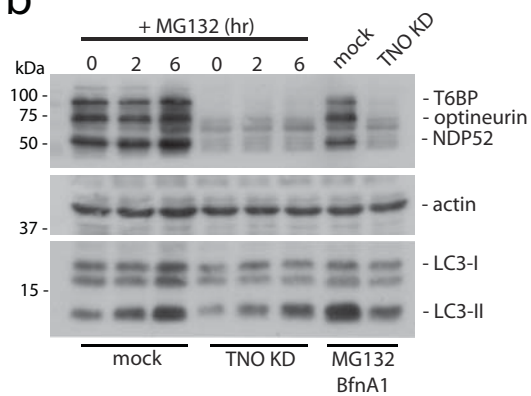

Supplement: NIHMS49789-supplement-figure_5.pdf [file NIHMS49789-supplement-figure_5.pdf]

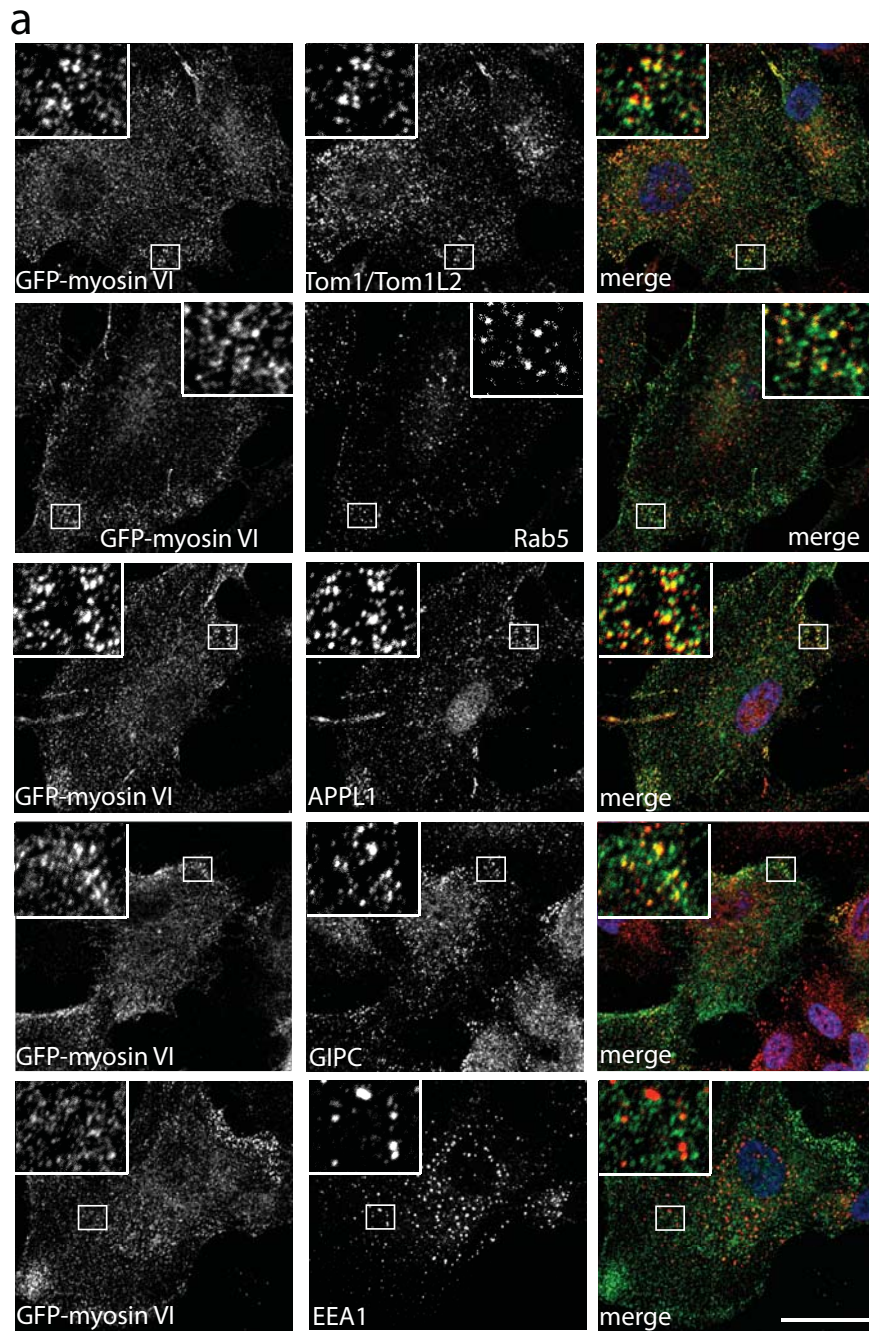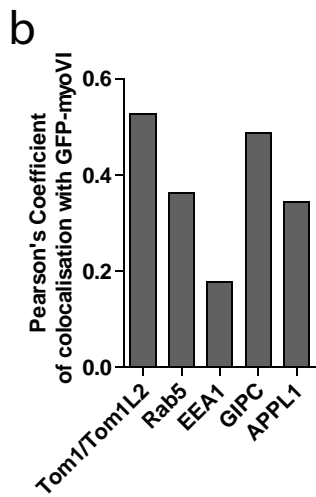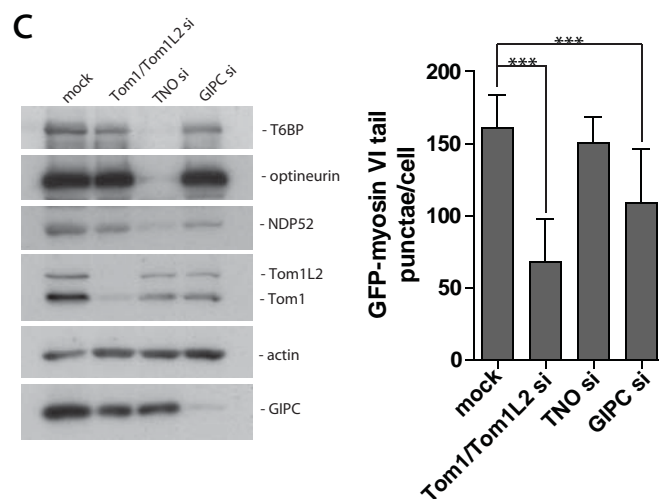

Supplement: NIHMS49789-supplement-figure_6.pdf [file NIHMS49789-supplement-figure_6.pdf]

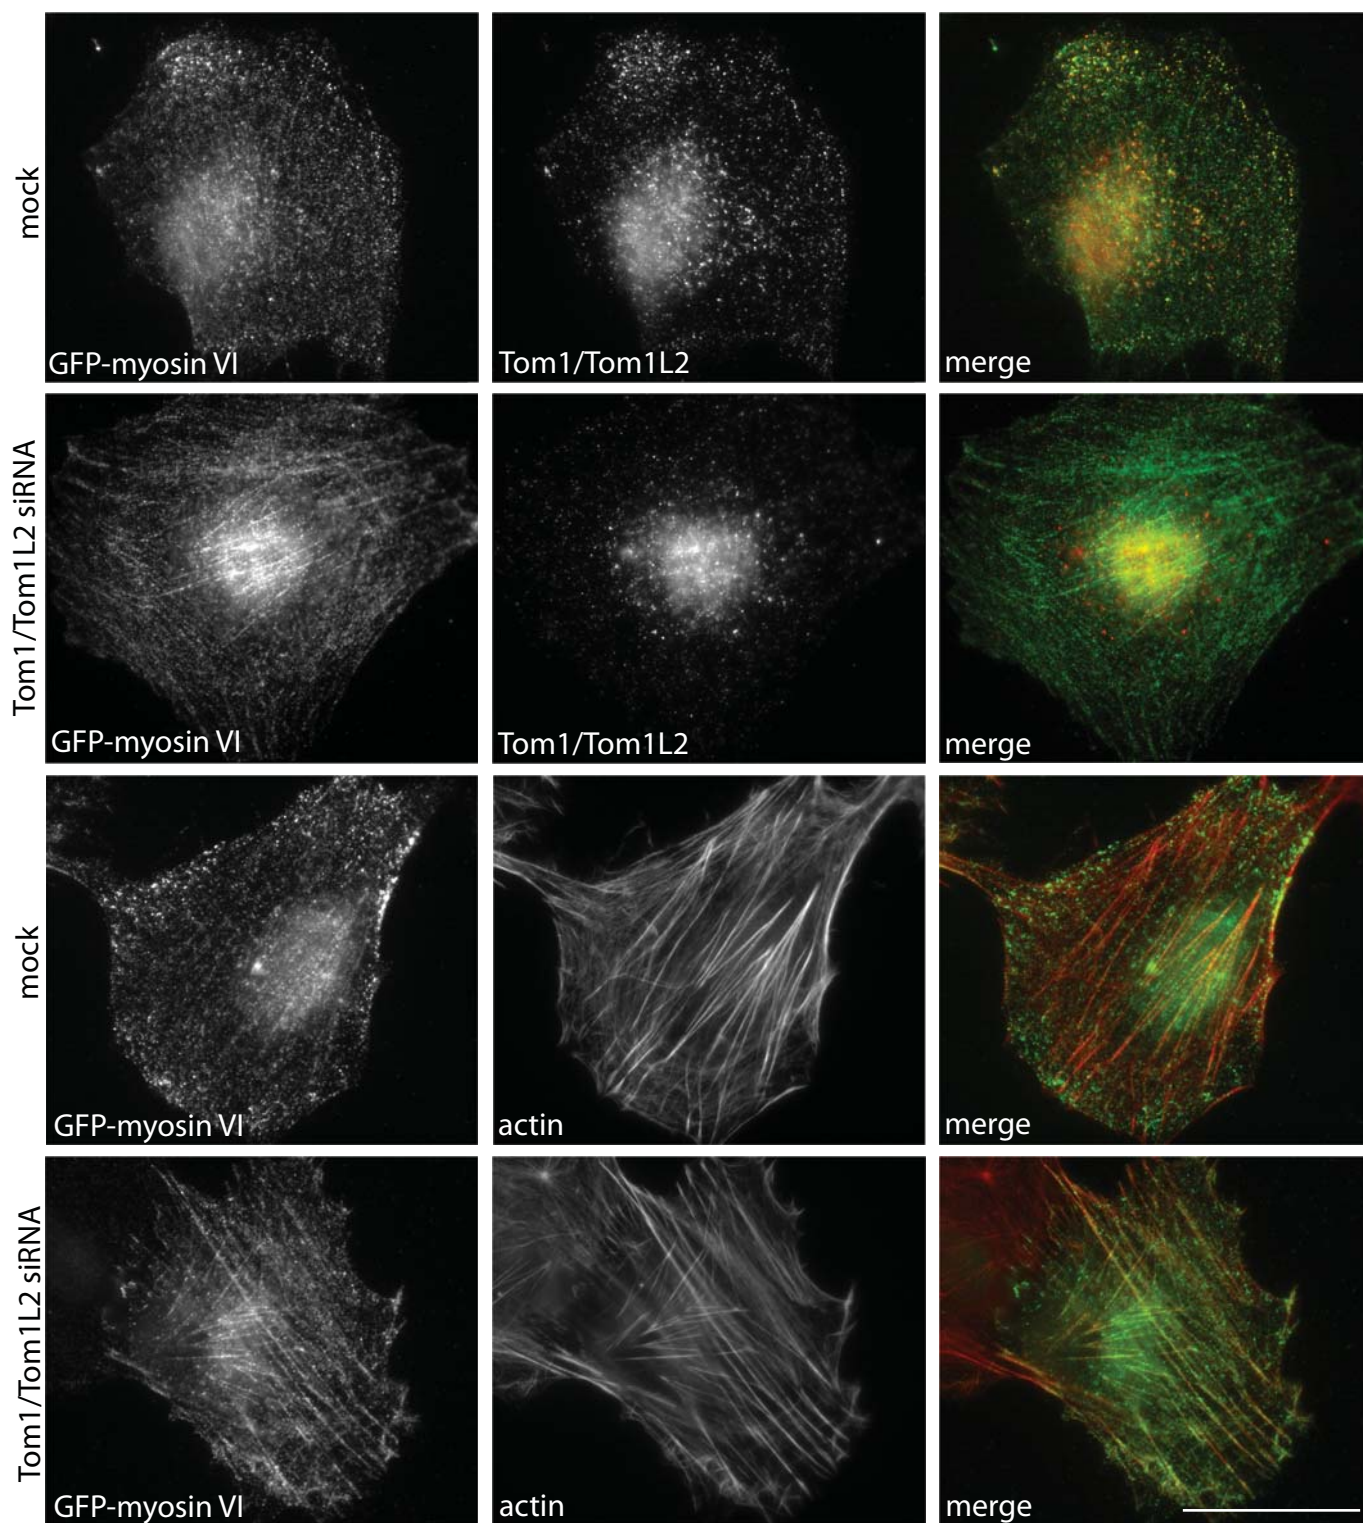

Tumbarello et al., Supplementary Figure 7

Supplement: NIHMS49789-supplement-figure_7.pdf [file NIHMS49789-supplement-figure_7.pdf]

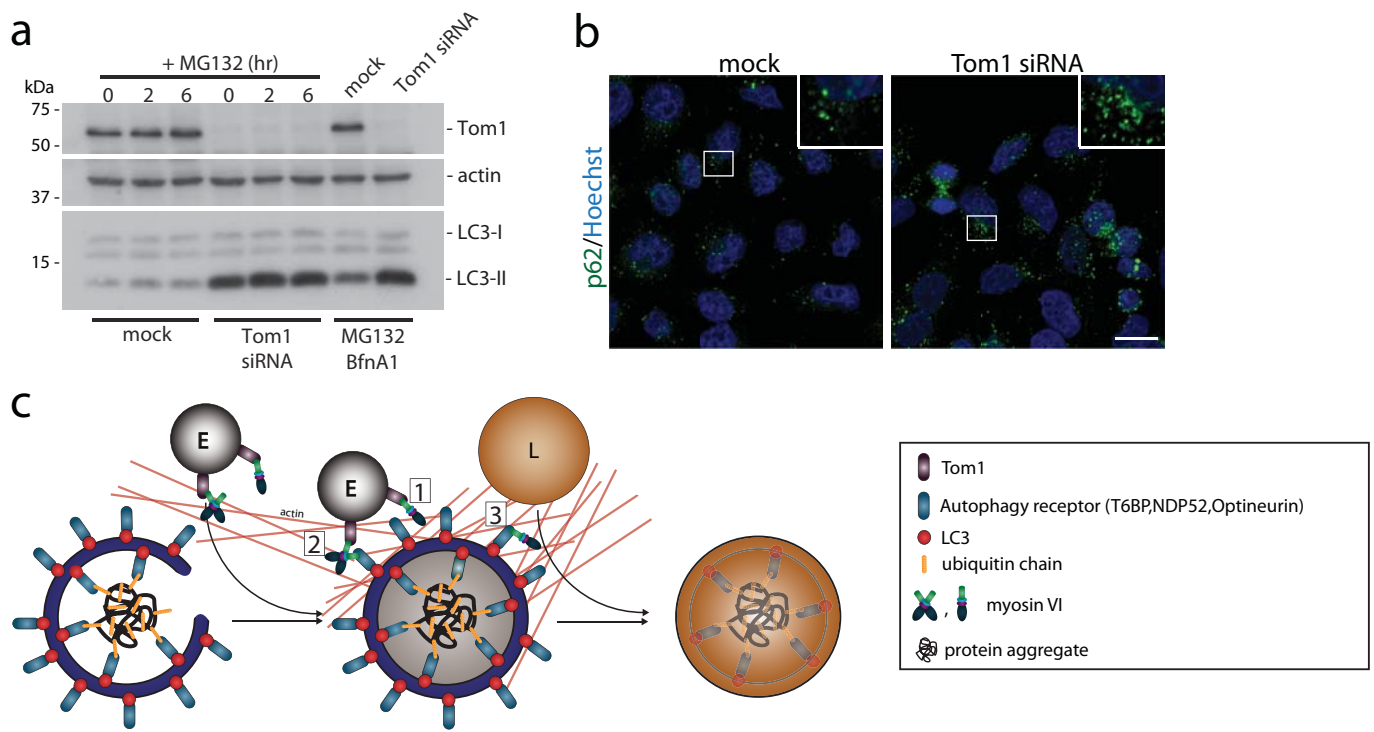

Tumbarello et al., Supplementary Figure 8

Supplement: NIHMS49789-supplement-figure_8.pdf [file NIHMS49789-supplement-figure_8.pdf]

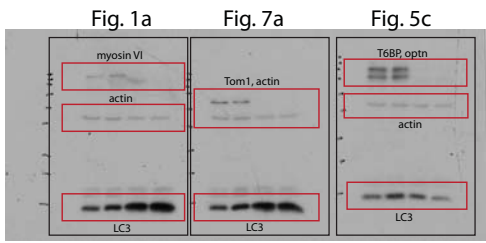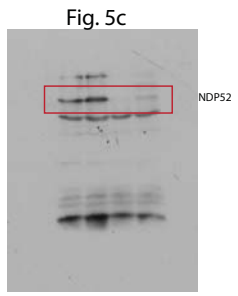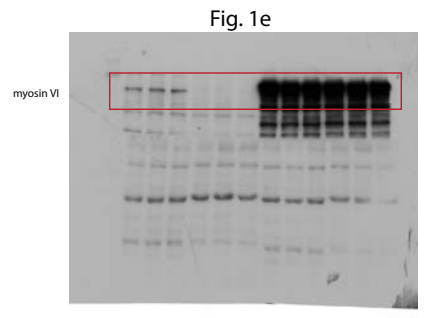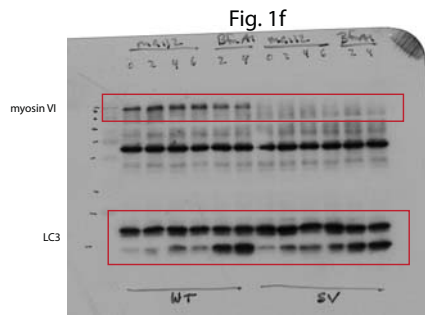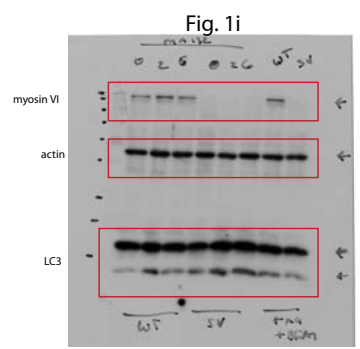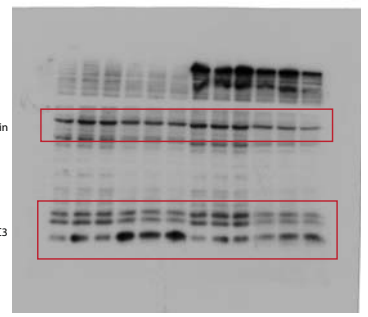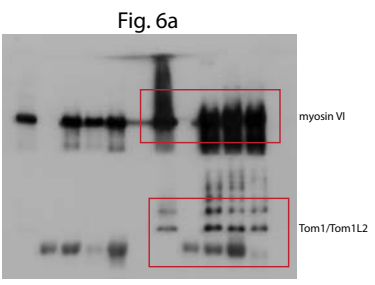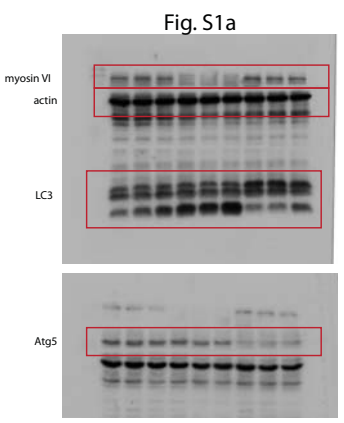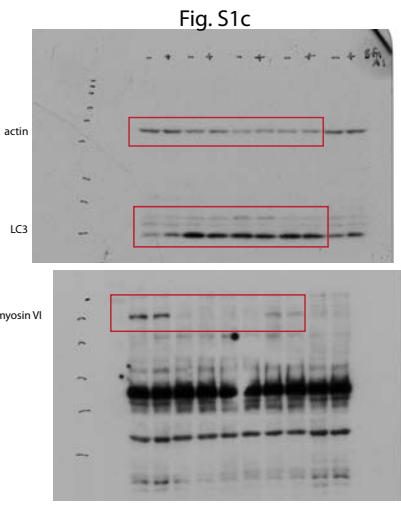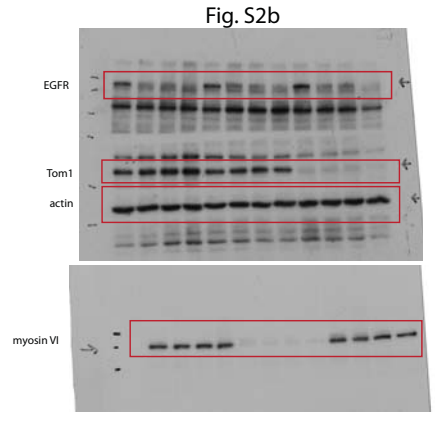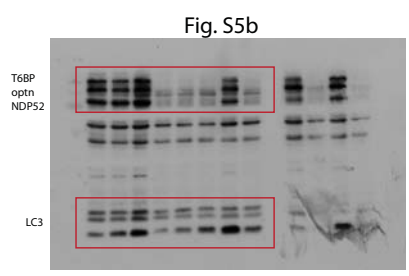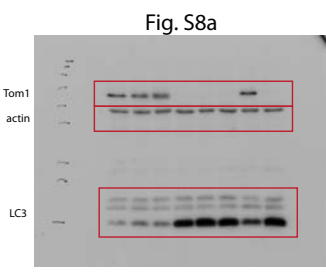

Supplement: NIHMS49789-supplement-figure_9.pdf [file NIHMS49789-supplement-figure_9.pdf]
